# Supplementary material for: An unrestrained proinflammatory M1 macrophage population induced by iron impairs wound healing in humans and mice
Source: JCI journal article supplement (doi:10.1172/jci44490), 2011-02-16
Supplement: sd1 [file 1]

301 Moved Permanently

# Moved Permanently

The document has moved here.
